# Supplementary material for: Genome-wide investigation and transcriptional analysis of cytosine-5 DNA methyltransferase and DNA demethylase gene families in tea plant (Camellia sinensis) under abiotic stress and withering processing
Source: PeerJ. 2020 Jan 14;8:e8432. doi: 10.7717/peerj.8432 (PMC6968495; doi:10.7717/peerj.8432)
Supplement: Supplemental Information 1 [file peerj-08-8432-s001.xls]

## Sheet: Sheet1
Supplementary Table S1. Basic information of C5-MTases and dMTases from Arabidopsis thaliana and Solanum lycopersicum.
Classification	Name	Accession number
C5-MTase	AtMET1	AT5G49160
	AtMET2a	AT4G14140
	AtMET2b	AT4G08990
	AtMET3	AT4G13610
	AtDRM1	AT5G15380
	AtDRM2	AT5G14620
	AtDRM3	AT3G17310
	AtCMT1	AT1G80740
	AtCMT2	AT4G19020
	AtCMT3	AT1G69770
	AtDNMT2	AT5G25480
	SlMET1	Solyc11g030600
	SlDRM5	Solyc02g062740
	SlDRM6	Solyc10g078190
	SlDRM7	Solyc04g005250
	SlCMT2	Solyc12g100330
	SlCMT3	Solyc01g006100
	SlCMT4	Solyc08g005400
	SlDNMT2	Solyc08g067070
dMTase	AtROS1	AT2G36490
	AtDML2	AT3G10010
	AtDML3	AT4G34060
	AtDME	AT5G04560
	SlROS1	Solyc09g009080
	SlDML	Solyc10g083630
	SlDML2	Solyc11g007580
