# Supplementary material for: Genome-wide investigation and transcriptional analysis of cytosine-5 DNA methyltransferase and DNA demethylase gene families in tea plant (Camellia sinensis) under abiotic stress and withering processing
Source: PeerJ. 2020 Jan 14;8:e8432. doi: 10.7717/peerj.8432 (PMC6968495; doi:10.7717/peerj.8432)
Supplement: Supplemental Information 2 [file peerj-08-8432-s002.xls]

## Sheet: Sheet1
Supplementary Table S2. Primers used for qRT-PCR analyses.
Classification	Gene name	Primer	Sequence (5'-3')
C5-MTase	CsMET1	Forward	TGGGCACTCTACAATTCAGACTC
		Reverse	CCCATCAAGACAAAACCCACTTC
	CsDRM1	Forward	GACAACCGATTCCAACTTCTTCC
		Reverse	TCAACTGCCTTTCGTATCCTCTC
	CsDRM2a	Forward	CCCATTCTCGTTCCACCTACTAG
		Reverse	CCACCAACTCCTGACAATGTTTC
	CsDRM2b	Forward	CAAGGAACCATACAAGAGGAGGT
		Reverse	CACCTATCCCAGAGAAAAGCGAT
	CsCMT1	Forward	CCAGTCAATTTTACATCCCGAGC
		Reverse	TGGGAGGAAGAGTCATGATAGGT
	CsCMT2	Forward	CATCCGATGACATTGAGGCTTTC
		Reverse	CAGTTCCAAGCTATCACATGCAG
	CsCMT3	Forward	CTAGGTGGGCTGTGGACATTAAT
		Reverse	CTTCATCACTGTCCAAGCTGTTG
	CsDNMT2	Forward	GGGTCCTTGAATTCTACAGTGGT
		Reverse	TAAGGTTGACACGGAGGAGAAAG
dMTase	CsROS1	Forward	CAGTCTTGTTGGCTCTTCGAAAG
		Reverse	CTTCTTGGGAACTTGCAGTCATG
	CsDML3	Forward	CTCAAGAAGCAACAGTTGACCAG
		Reverse	AGGGAGTTTCAGTCTGAGGGAT
	CsDME1a	Forward	GATGATCCAAGCCCATACCTTCT
		Reverse	TTGGAAGTAGGTACCGTTGAGTG
	CsDME1b	Forward	TGCATTCTATGAGGATCCTGACG
		Reverse	TCTTCAGTTTGGGTGTAGGGATG
reference gene	GAPDH	Forward	TTGGCATCGTTGAGGGTCT
		Reverse	CAGTGGGAACACGGAAAGC
	β-actin	Forward	GCCATCTTTGATTGGAATGG
		Reverse	GGTGCCACAACCTTGATCTT
