# Supplementary material for: Genome-wide investigation and transcriptional analysis of cytosine-5 DNA methyltransferase and DNA demethylase gene families in tea plant (Camellia sinensis) under abiotic stress and withering processing
Source: PeerJ. 2020 Jan 14;8:e8432. doi: 10.7717/peerj.8432 (PMC6968495; doi:10.7717/peerj.8432)
Supplement: Supplemental Information 3 [file peerj-08-8432-s003.xls]

## Sheet: Sheet1
Supplementary Table S3. C5-MTases and dMTases used for the construction of phylogenetic trees.
Classification	Name	Accession number
C5-MTase	CsMET1	CSA018787.1
	CsDRM1	CSA001898.1
	CsDRM2a	CSA001531.1
	CsDRM2b	CSA005657.1
	CsCMT1	CSA032127.1
	CsCMT2	CSA030966.1
	CsCMT3	CSA021917.1
	CsDNMT2	CSA000025.1
	AtMET1	AT5G49160
	AtMET2a	AT4G14140
	AtMET2b	AT4G08990
	AtMET3	AT4G13610
	AtDRM1	AT5G15380
	AtDRM2	AT5G14620
	AtDRM3	AT3G17310
	AtCMT1	AT1G80740
	AtCMT2	AT4G19020
	AtCMT3	AT1G69770
	AtDNMT2	AT5G25480
	RcMET1-1	29983.m003308
	RcMET1-2	29609.m000606
	RcDRM1	29631.m001043
	RcDRM2	29917.m001982
	RcDRM3	29889.m003366
	RcCMT1	28582.m000332
	RcCMT2	29827.m002677
	RcDNMT2	29848.m004665
	CcMET1-like	Ccrd_v1.0_010519
	CcDRM2-like1	Ccrd_v1.0_016019
	CcDRM2-like2	Ccrd_v1.0_005163
	CcDRM2-like3	Ccrd_v1.0_019228
	CcDRM3-like1	Ccrd_v1.0_022006
	CcCMT2-like1	Ccrd_v1.0_002059
	CcCMT2-like2	Ccrd_v1.0_006352
	CcCMT3-like1	Ccrd_v1.0_007368
	CcCMT3-like2	Ccrd_v1.0_001283
	CcCMT3-like3	Ccrd_v1.0_001941
	CcDnmt2-like1	Ccrd_v1.0_007707
	CcDnmt2-like2	Ccrd_v1.0_007710
	SlMET1	Solyc11g030600
	SlDRM5	Solyc02g062740
	SlDRM6	Solyc10g078190
	SlDRM7	Solyc04g005250
	SlCMT2	Solyc12g100330
	SlCMT3	Solyc01g006100
	SlCMT4	Solyc08g005400
	SlDNMT2	Solyc08g067070
	OsMET1	LOC_Os03g58400
	OsMET2	LOC_Os07g08500
	OsDRM1a	LOC_Os11g01810
	OsDRM2	LOC_Os03g02010
	OsCMT1	LOC_Os03g12570
	OsCMT2	LOC_Os05g13780
	OsCMT3	LOC_Os10g01570
	ZmDRM2b	GRMZM2G137366
	ZmDRM2a	GRMZM2G065599
	ZmCMT1	GRMZM2G025592
	ZmCMT2	GRMZM2G005310
	GmMET1	Glyma04G187600
	GmMET2	Glyma06G178200
	GmDRM1	Glyma02G035700
	GmDRM2	Glyma05G005600
	GmDRM3	Glyma07G233200
	GmDRM4	Glyma7G038300
	GmDRM5	Glyma9G006100
	GmCMT1	Glyma01G007800
	GmCMT4	Glyma6G103500
dMTase	CsROS1	CSA023990.1
	CsDML3	CSA015244.1
	CsDME1a	CSA015772.1
	CsDME1b	CSA017793.1
	AtROS1	AT2G36490
	AtDML2	AT3G10010
	AtDML3	AT4G34060
	AtDME	AT5G04560
	RcROS	29092.m000452
	RcDML3	29991.m000647
	RcDME	29428.m000327
	CcDemethylase-like1	Ccrd_v1.0_014789
	CcDemethylase-like2	Ccrd_v1.0_011967
	CcDemethylase-like3	Ccrd_v1.0_011203
	CcDemethylase-like4	Ccrd_v1.0_007522
	CcDemethylase-like5	Ccrd_v1.0_013688
	SlROS1	Solyc09g009080
	SlDML	Solyc10g083630
	SlDML2	Solyc11g007580
	OsDemethylase-like1	LOC_Os01g11900
	OsDemethylase-like2	LOC_Os05g37410
	ZmDemethylase-like1	GRMZM2G123587
	ZmDemethylase-like2	GRMZM2G131756
	ZmDemethylase-like3	GRMZM2G422464
	GmDemethylase-like1	Glyma03G190800
	GmDemethylase-like2	Glyma10G202200
	GmDemethylase-like3	Glyma13G151000
	GmDemethylase-like4	Glyma20G188300
