# Supplementary material for: Genome-wide investigation and transcriptional analysis of cytosine-5 DNA methyltransferase and DNA demethylase gene families in tea plant (Camellia sinensis) under abiotic stress and withering processing
Source: PeerJ. 2020 Jan 14;8:e8432. doi: 10.7717/peerj.8432 (PMC6968495; doi:10.7717/peerj.8432)
Supplement: Supplemental Information 4 [file peerj-08-8432-s004.xls]

## Sheet: Sheet1
Supplementary Table S4. Consensus sequences of motifs identified in CsC5-MTases and CsdMTases in tea plant.
Classification	Motif ID	Length	Best match sequence	E-value
CsC5-MTase	MEME-1	41	HPDQDRVLTIRECARLQGFPDYYKFCGSVKZRYRQVGNAVA	3.2e-57
	MEME-2	50	EPEFVDSKYFCAAARKRGYVHNLPIDNRFPLLPLPPLTIHEALPLTKKWW	2.4e-52
	MEME-3	29	KJLPLPGGVDLIIGGPPCQGLSGYNRFRR	7.5e-52
	MEME-4	50	LFSGIGGAEVALHRLGIPLKNVVSVEKSEVNRNIVRSWWEQTNQKGNLID	7e-41
	MEME-5	50	WDGEPPLHVQKYVLDECRKWNLVWVGRNKVAPLEPDEVEMLLGFPRNHTR	1.6e-43
	MEME-6	50	PMIGFGVPSEPWQTLHRTLPEAAIGPPYFYYENVALTPKGVWDTIKRFLY	4.1e-41
	MEME-7	50	YSGCGGMSTGLCLGAKLSGVDLVTRWAVDIDKSACESLKLNHPETQVRNE	3.1e-33
	MEME-8	50	NRQIVVFMDIVEFLKPKYVLMENVVDILRFGKGTLGRLALSRLVEMNYQV	8.9e-29
	MEME-9	27	PSWDSRTKLNCLQTCIGSAKLTERIRK	6.7e-21
	MEME-10	33	AAGSYGLSQSRLRVFLWGAGPPEKLPQFPJPTH	2e-20
CsdMTase	MEME-1	50	IPCRTAMRGSFPLNGTYFQVNEVFADHESSLNPIDVPRAWIWNLPRRTVY	1.5e-96
	MEME-2	50	VREHGSIDLEWLRDVPPDKAKDYLLSIRGLGLKSVECVRLLTLHHLAFPV	3.9e-93
	MEME-3	50	KWWEEERKVFRGRADSFIARMHLVQGDRRFSQWKGSVVDSVIGVFLTQNV	1.1e-57
	MEME-4	50	GRRKERTKNTMDSLDWEAIRCADVNEIADAIKERGMNNVLAGRIKDFLNR	1.4e-52
	MEME-5	28	HPLLKGLDKREPDDPSPYLLAIWTPGET	2.9e-35
	MEME-6	41	DIEDAFYEDPDDIPTIKLNIEEFTQNLQNYMQENMELHEGD	8.7e-39
	MEME-7	50	DTNVGRIAVRLGWVPLQPLPESLQLHLLELYPLLESIQKYLWPRLCKLDQ	7.5e-35
	MEME-8	41	FASARLALPGPEEKSIVSSTIPIAADKNPVVVIKPMPLPPP	7e-19
	MEME-9	27	KKRKPRPKVDLDPETNRIWKLLMEKEG	7.7e-18
	MEME-10	29	LVALTPEAASIPTPKLKNVSRLRTEHQVY	5.4e-14
